# Supplementary material for: Catalytic Hydrogen Evolution of NaBH4 Hydrolysis by Cobalt Nanoparticles Supported on Bagasse-Derived Porous Carbon
Source: MDPI journal article supplement (doi:10.3390/nano11123259), 2021-11-30
Supplement: s1 [file s1]

## Supplementary Material

# Catalytic Hydrogen Evolution of NaBH<sub>4</sub> Hydrolysis by Cobalt Nanoparticles Supported on Bagasse-Derived Porous Carbon

Yiting Bu <sup>1,2,†</sup>, Jiayi Liu <sup>1,†</sup>, Hailiang Chu <sup>1</sup>, Sheng Wei <sup>1,2</sup>, Qingqing Yin <sup>1</sup>, Li Kang <sup>1</sup>, Xiaoshuang Luo <sup>1</sup>, Lixian Sun <sup>1,2,\*</sup>, Fen Xu <sup>1,\*</sup>, Pengru Huang <sup>1,3</sup>, Federico Rosei <sup>4</sup>, Aleskey A. Pimerzin <sup>5</sup>, Hans Juergen Seifert <sup>6</sup>, Yong Du <sup>7</sup> and Jianchuan Wang <sup>7</sup>

<sup>1</sup> Guangxi Key Laboratory of Information Materials and Guangxi Collaborative Innovation Center of Structure and Property for New Energy and Materials, School of Material Science & Engineering, Guilin University of Electronic Technology, Guilin 541004, China; ytb1172701255@163.com (Y.B.); jxliu2019@126.com (J.L.); chuhailiang@guet.edu.cn (H.C.); ws1801101003@163.com (S.W.); yqq15870030656@163.com (Q.Y.); kangli000hello@163.com (L.K.); shirley\_lxs@126.com (X.L.); pengruhuang@guet.edu.cn (P.H.)

<sup>2</sup> School of Mechanical & Electrical Engineering, Guilin University of Electronic Technology, Guilin 541004, China

<sup>3</sup> Department of Materials Science and Engineering, National University of Singapore, Singapore 117575, Singapore

<sup>4</sup> Centre for Energy, Materials and Telecommunications, Institut National de la Recherche Scientifique, 1650 Boulevard Lionel-Boulet Varennes, Québec, QC J3X 1S2, Canada; rosei@emt.inrs.ca

<sup>5</sup> Chemical Department, Samara State Technical University, 443100 Samara, Russia; al.pimerzin@gmail.com

<sup>6</sup> Karlsruhe Institute of Technology, Institute for Applied Materials-Applied Materials Physics, Hermann-von-Helmholtz-Platz 1, 76344 Eggenstein-Leopoldshafen, Germany; hans.Seifert@kit.edu

<sup>7</sup> State Key Laboratory of Powder Metallurgy, Central South University, Changsha 410083, China; yong-du@csu.edu.cn (Y.D.); jcw728@126.com (J.W.)

\* Correspondence: sunlx@guet.edu.cn (L.S.); xufen@guet.edu.cn (F.X.)

† Yiting Bu and Jiayi Liu contributed equally.

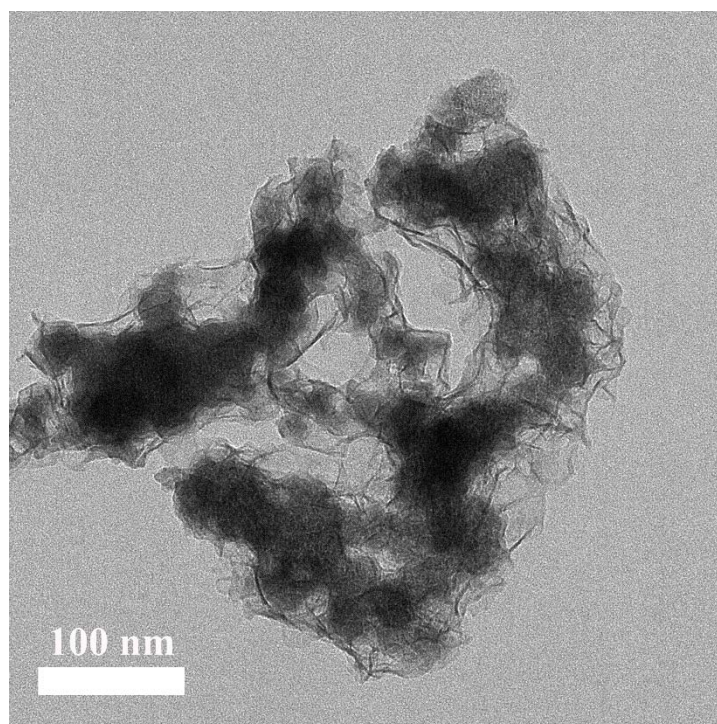

Figure S1. TEM image of Co@150PC.

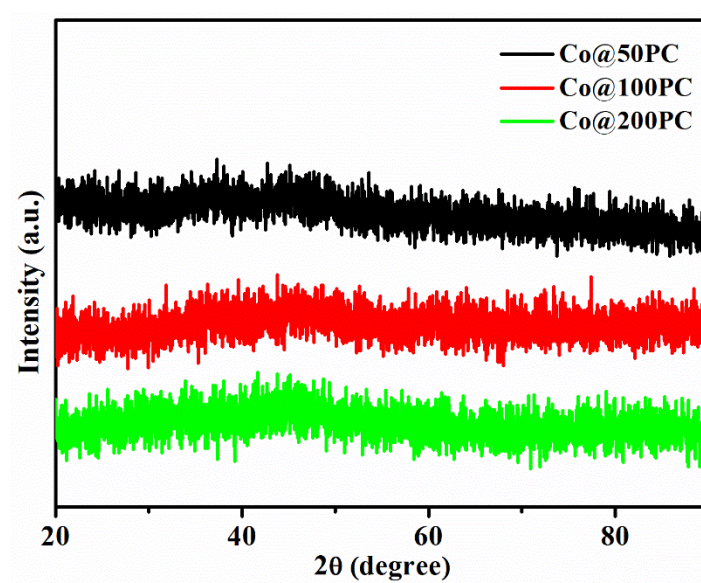

Figure S2. XRD patterns of Co@50PC, Co@100PC and Co@200PC.

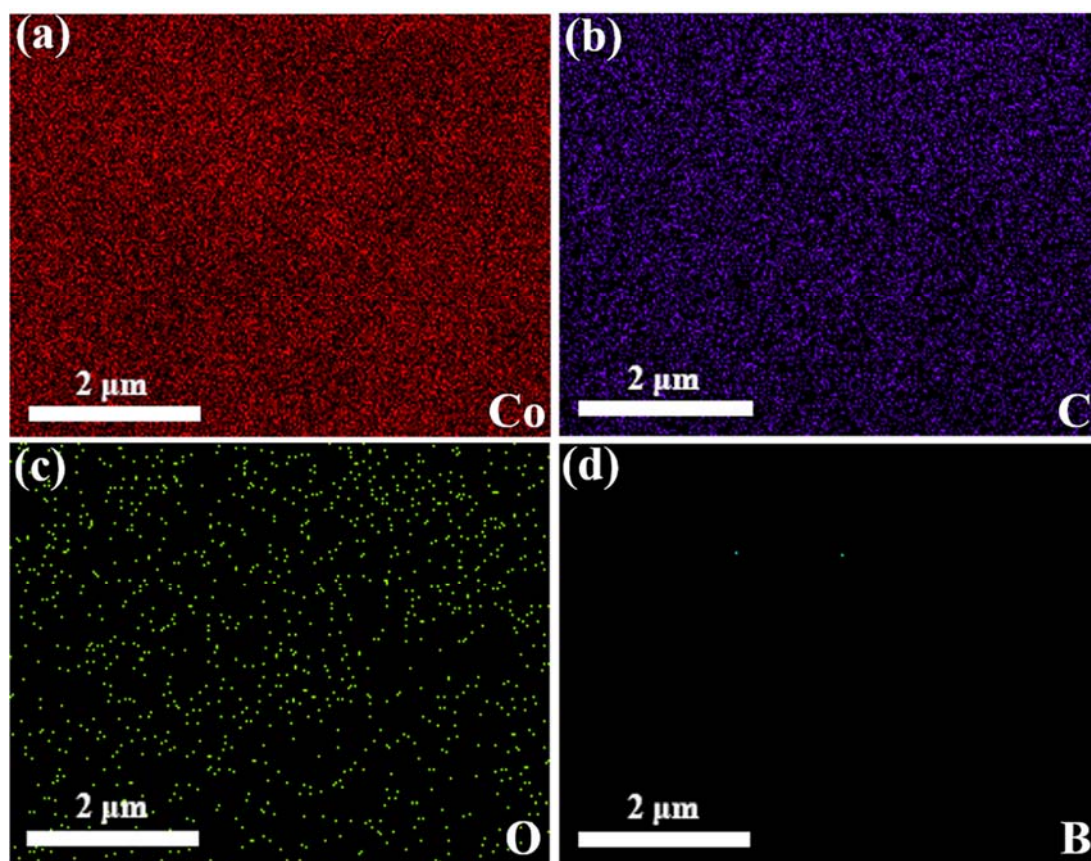

Figure S3. Corresponding EDS mapping Co@150PC (a–d).

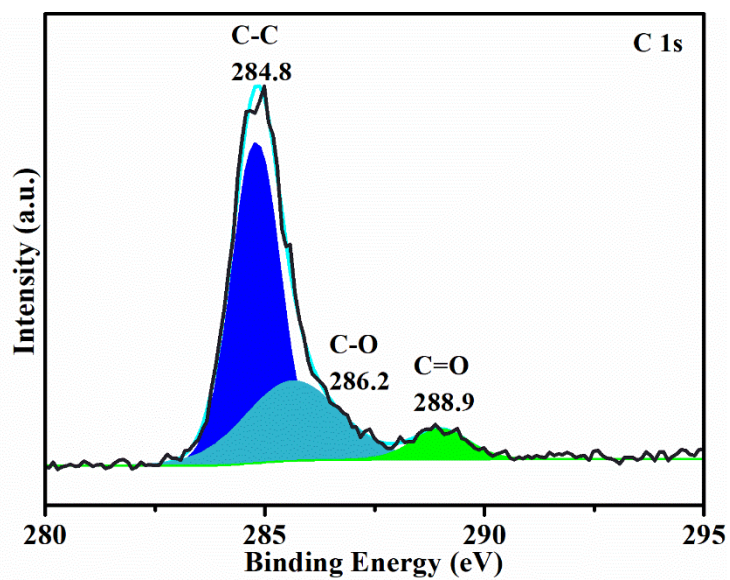

Figure S4. C 1s XPS spectrum of Co@150PC.

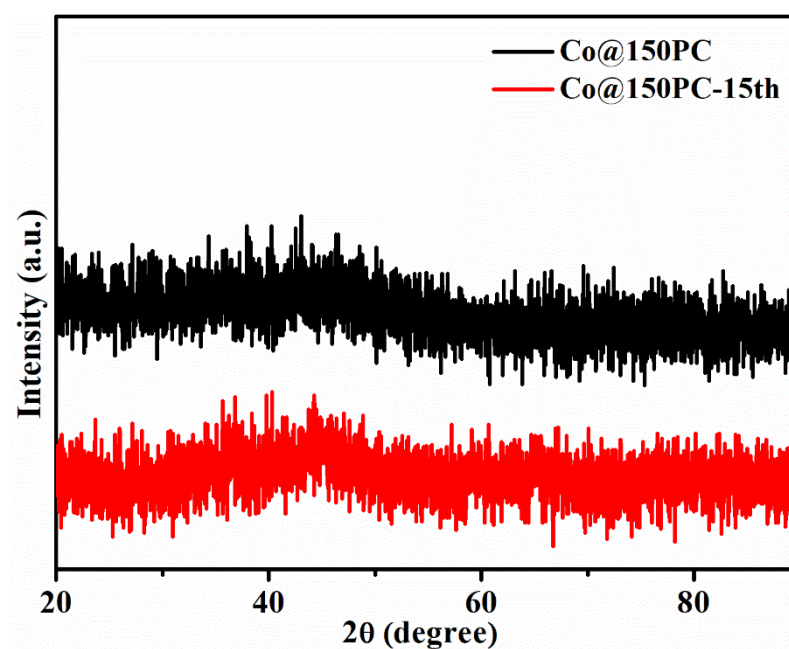

**Figure S5.** XRD patterns of Co@150PC and Co@150PC-15th b.
